# Supplementary material for: Revision of the ant-eating spider genus Mallinus Simon, 1893 (Araneae, Zodariidae)
Source: Zookeys. 2019 Feb 6;(822):141–58. doi: 10.3897/zookeys.822.29835 (PMC6374355; doi:10.3897/zookeys.822.29835)
Supplement: Supplementary material 1 [file zookeys-822-141-s001.xlsx]

## Sheet: Sheet1
Species	Country	Province	Locality	Latitude	Longitude	Collecting date	Collector(s)	Ecology	Juveniles	Males	Females	Depository	Comment
Mallinus nitidiventris Simon, 1893	SOUTH AFRICA	Eastern Cape	Aberdeen district, Farm Bokvlei	32°25.8'S	23°21.0'E	14.XII.2007	D.H. Jacobs	pit trap, karoo		2		NCA 2008/4662
Mallinus nitidiventris Simon, 1893	SOUTH AFRICA	Eastern Cape	Aberdeen district, Farm De Pannen	32°41.4'S	23°25.8'E	14.XII.2007	D.H. Jacobs	pit trap	1	4		NCA 2011/604
Mallinus nitidiventris Simon, 1893	SOUTH AFRICA	Eastern Cape	Aberdeen district, Farm Juriesfontein	32°31.8'S	23°25.8'E	11.XII.2007	D.H. Jacobs	pit trap		1		NCA 2008/4665
Mallinus nitidiventris Simon, 1893	SOUTH AFRICA	Eastern Cape	Aberdeen district, Farm Nuwejaarsfontein	32°57.0'S	24°23.4'E	14.XII.2007	D.H. Jacobs	pit trap, karoo	2	7	1	NCA 2008/2612
Mallinus nitidiventris Simon, 1893	SOUTH AFRICA	Free State	Luckhoff district, Farm Bankfontein	30°04.980'S	24°54.170'E	22.I.2015	C. Haddad	base of grass tussocks, wetland margin		1		NCA 2015/1655
Mallinus nitidiventris Simon, 1893	SOUTH AFRICA	Free State	Luckhoff district, Farm Bankfontein	30°04.421'S	24°53.017'E	6–8.IV.2015	C. Haddad	hand collecting, Nama Karoo veld		1	1	NCA 2015/1818
Mallinus nitidiventris Simon, 1893	SOUTH AFRICA	Free State	Luckhoff district, Farm Bankfontein	30°04.421'S	24°53.038'E	26.III.2017	C. Haddad & R. Booysen	hand collecting, Nama Karoo veld	3	5		NCA 2017/1447
Mallinus nitidiventris Simon, 1893	SOUTH AFRICA	Free State	Luckhoff district, Farm Bankfontein	30°04.974'S	24°54.297'E	2–6.IV.2015	University of the Free State students	pitfall traps, Nama Karoo veld		1		NCA 2015/2398
Mallinus nitidiventris Simon, 1893	SOUTH AFRICA	Free State	Luckhoff district, Farm Bankfontein	30°04.421'S	24°53.013'E	24–26.XI.2015	C. Haddad & R. Booysen	night collecting		1		NCA 2015/2231
Mallinus nitidiventris Simon, 1893	SOUTH AFRICA	Northern Cape	Goepag Nature Reserve	29°39.906'S	17°59.838'E	14–16.VII.2017	R. Booysen, Z. Mbo & R. Christiaan	pitfall traps, Nama Karoo veld	1			NCA 2017/1189
Mallinus nitidiventris Simon, 1893	SOUTH AFRICA	Northern Cape	Pofadder	29°22'S	19°07'E	15.X.2006	L. Spangenberg	pitfall traps			1	MRAC 222264
Mallinus nitidiventris Simon, 1893	SOUTH AFRICA	Northern Cape	Tswalu Game Reserve, man-made dam	27°15'S	22°27'E	6.II.2005	R. Jocqué	savanna shrubland, by hand		1		MRAC 216253
Mallinus nitidiventris Simon, 1893	SOUTH AFRICA	Western Cape	Beaufort West district, Farm Eerste Water	32°41.4'S	22°57.6'E	6.XII.2007	D.H. Jacobs	pit trap, karoo	1			NCA 2008/2610
Mallinus nitidiventris Simon, 1893	SOUTH AFRICA	Western Cape	Matjiesfontein	33°15'S	20°40'E	Unknown	Unknown	unknown	1saM 1saF			MNHN AR 3280	Lectotype + paralectotype
Mallinus nitidiventris Simon, 1893	SOUTH AFRICA	Western Cape	Prince Albert, Tierberg	33°13'S	22°02'E	23.IX.1989	R. Dean	old lands		1		NCA 91/1299
Mallinus nitidiventris Simon, 1893	SOUTH AFRICA	Western Cape	Prince Albert, Tierberg	33°13'S	22°02'E	23.IX.1989	R. Dean	old lands			1	NCA 91/1300
